# Supplementary material for: The antitumour activity of 2‐(4‐amino‐3‐methylphenyl)‐5‐fluorobenzothiazole in human gastric cancer models is mediated by AhR signalling
Source: PubMed Central journal article supplement (PMC6991636; doi:10.1111/jcmm.14869), 2019-12-25

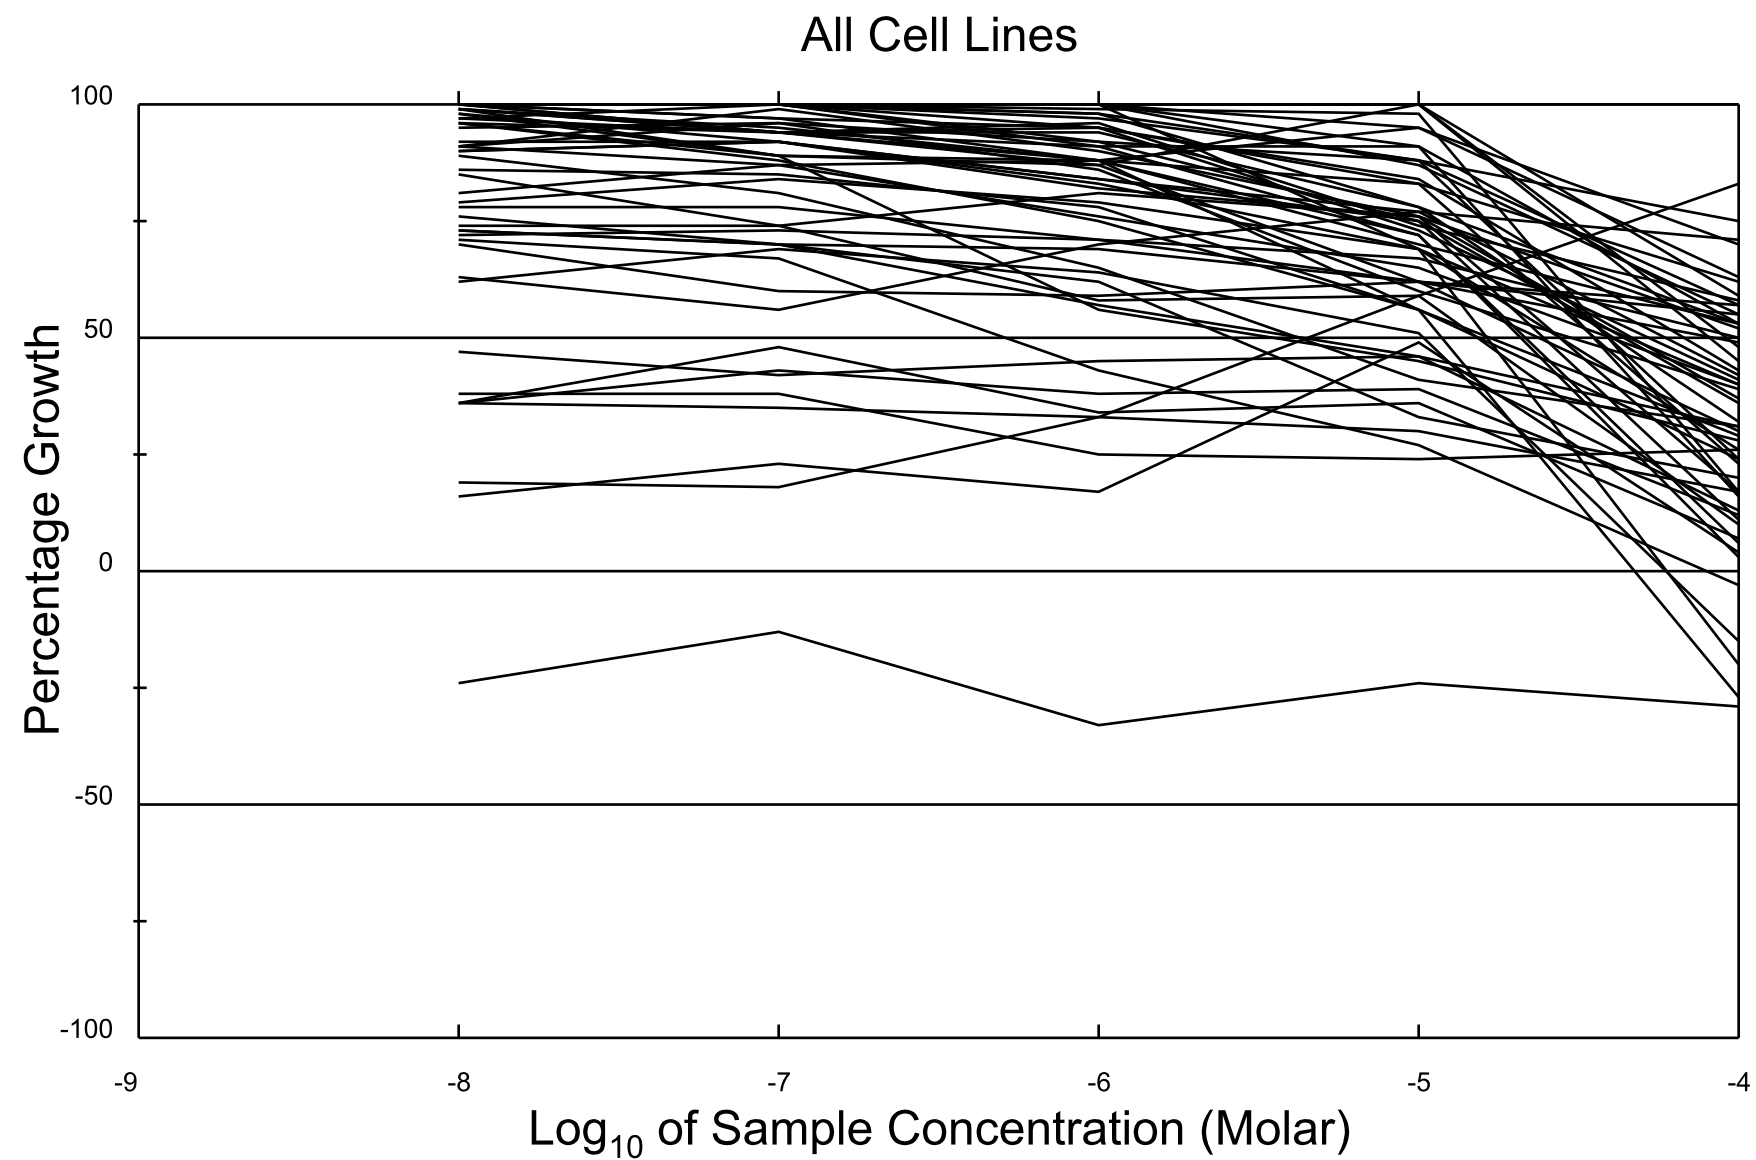

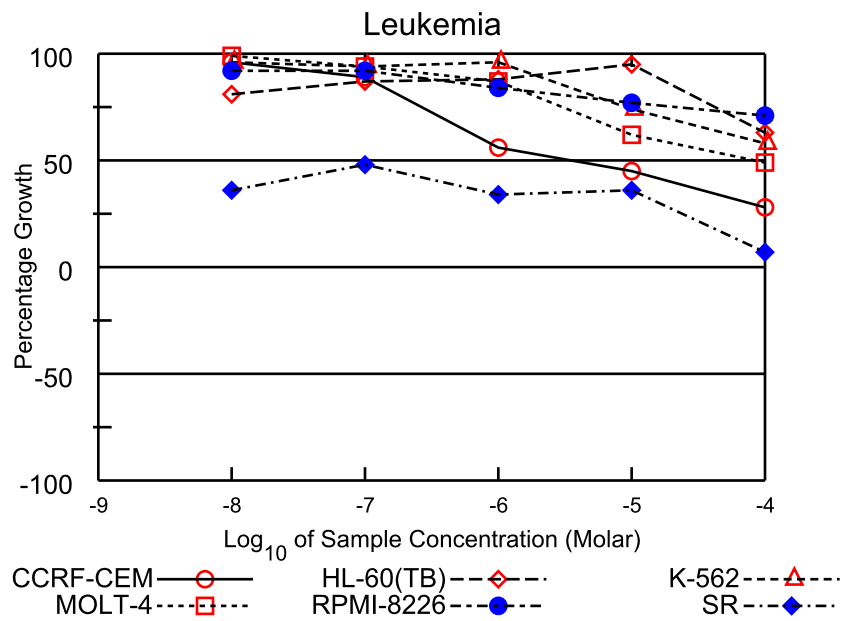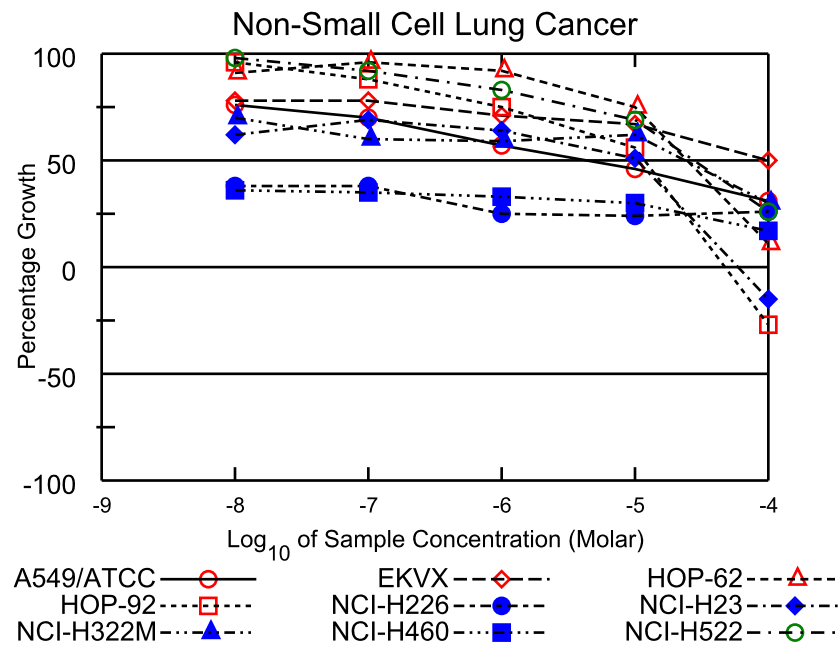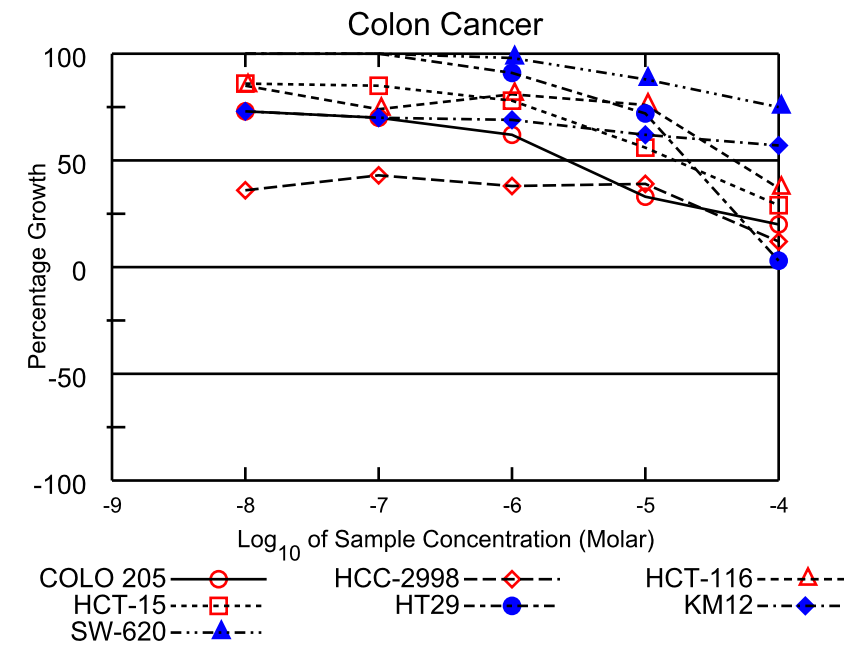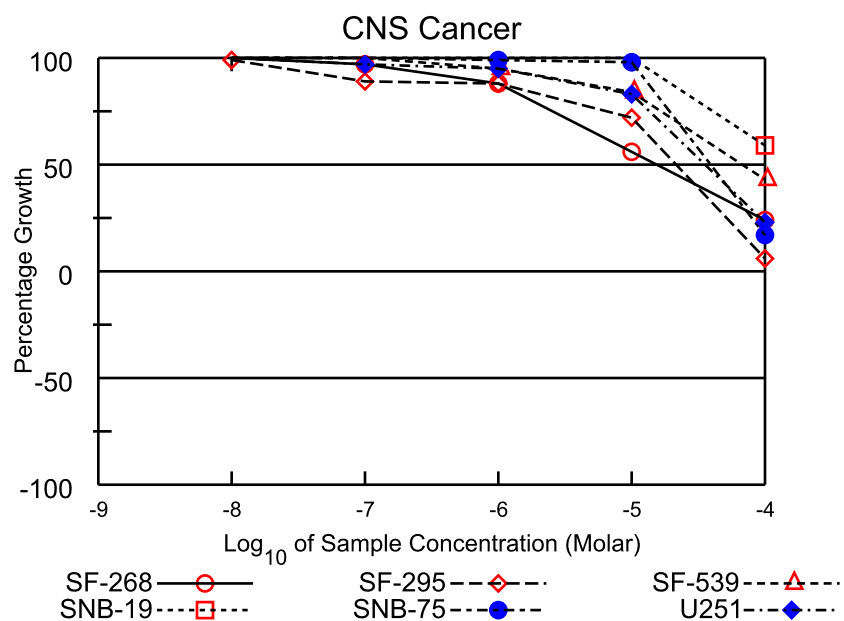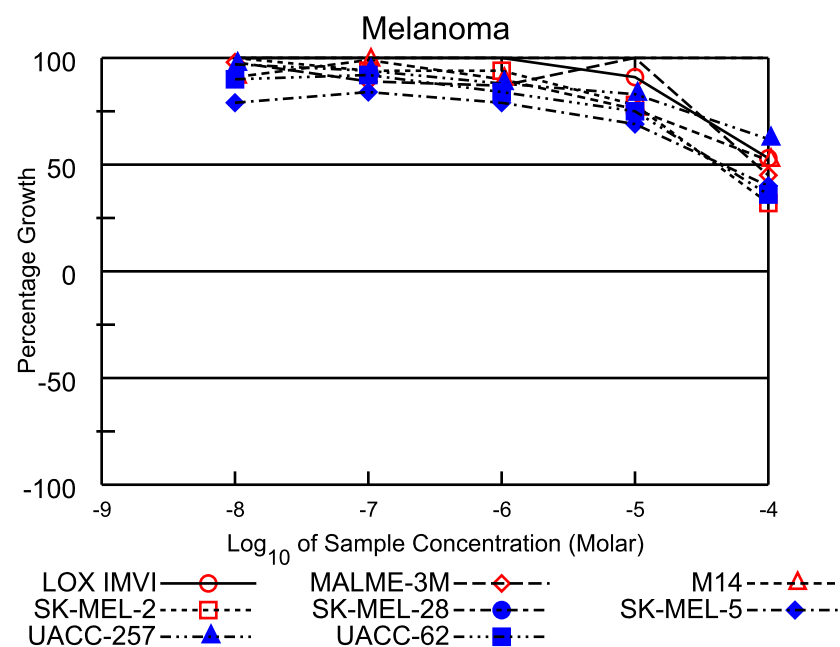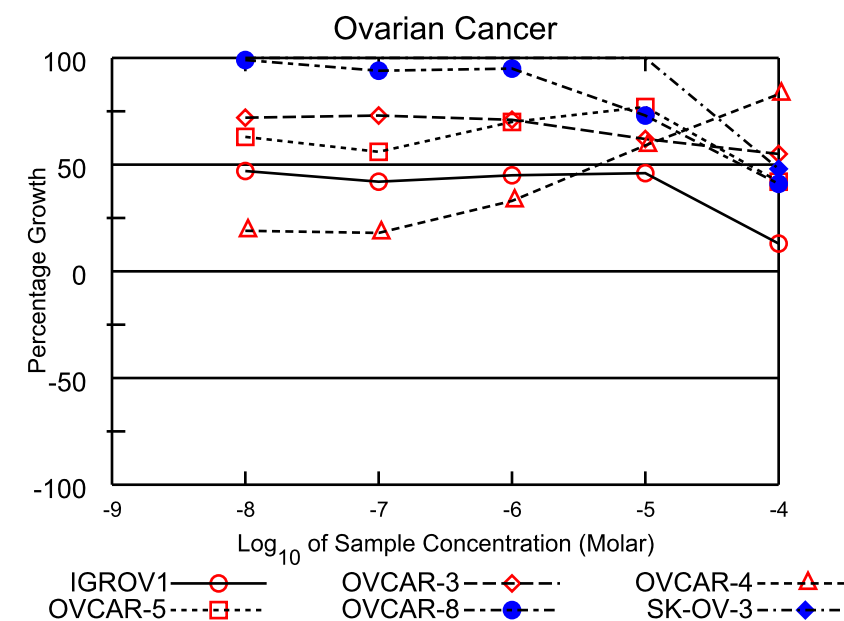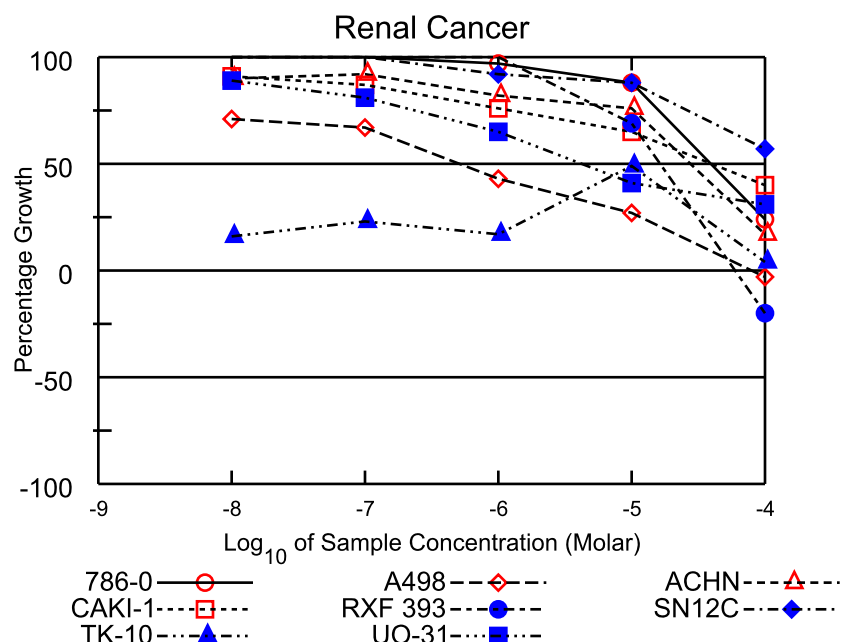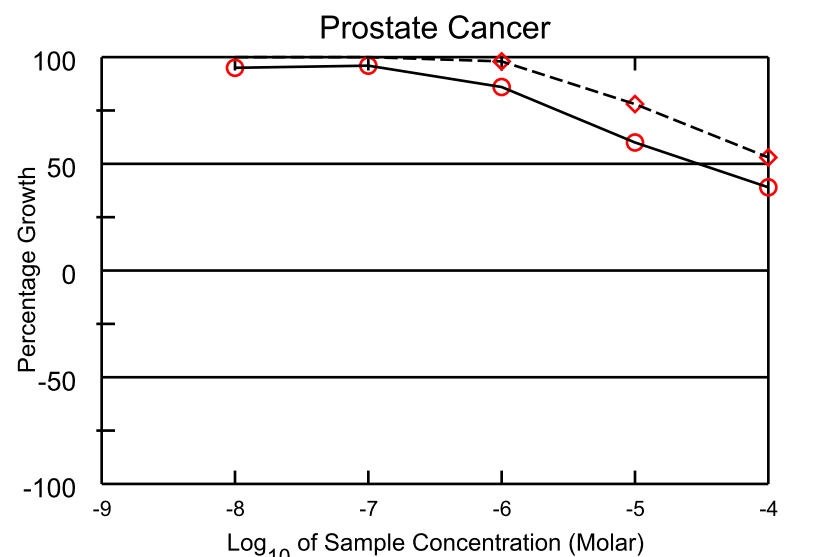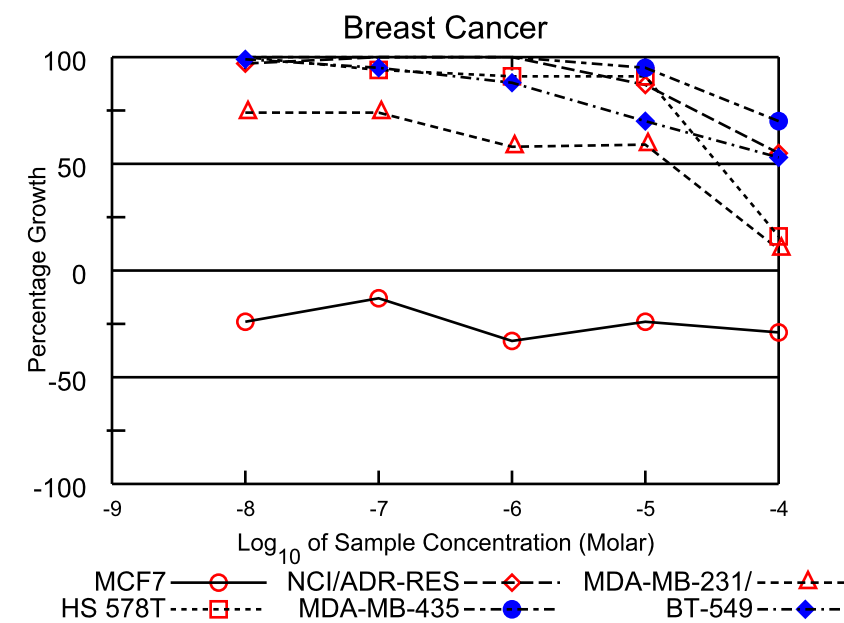



Mean Graphs

Report Date : September 27, 2007

Test Date : January 27, 2003

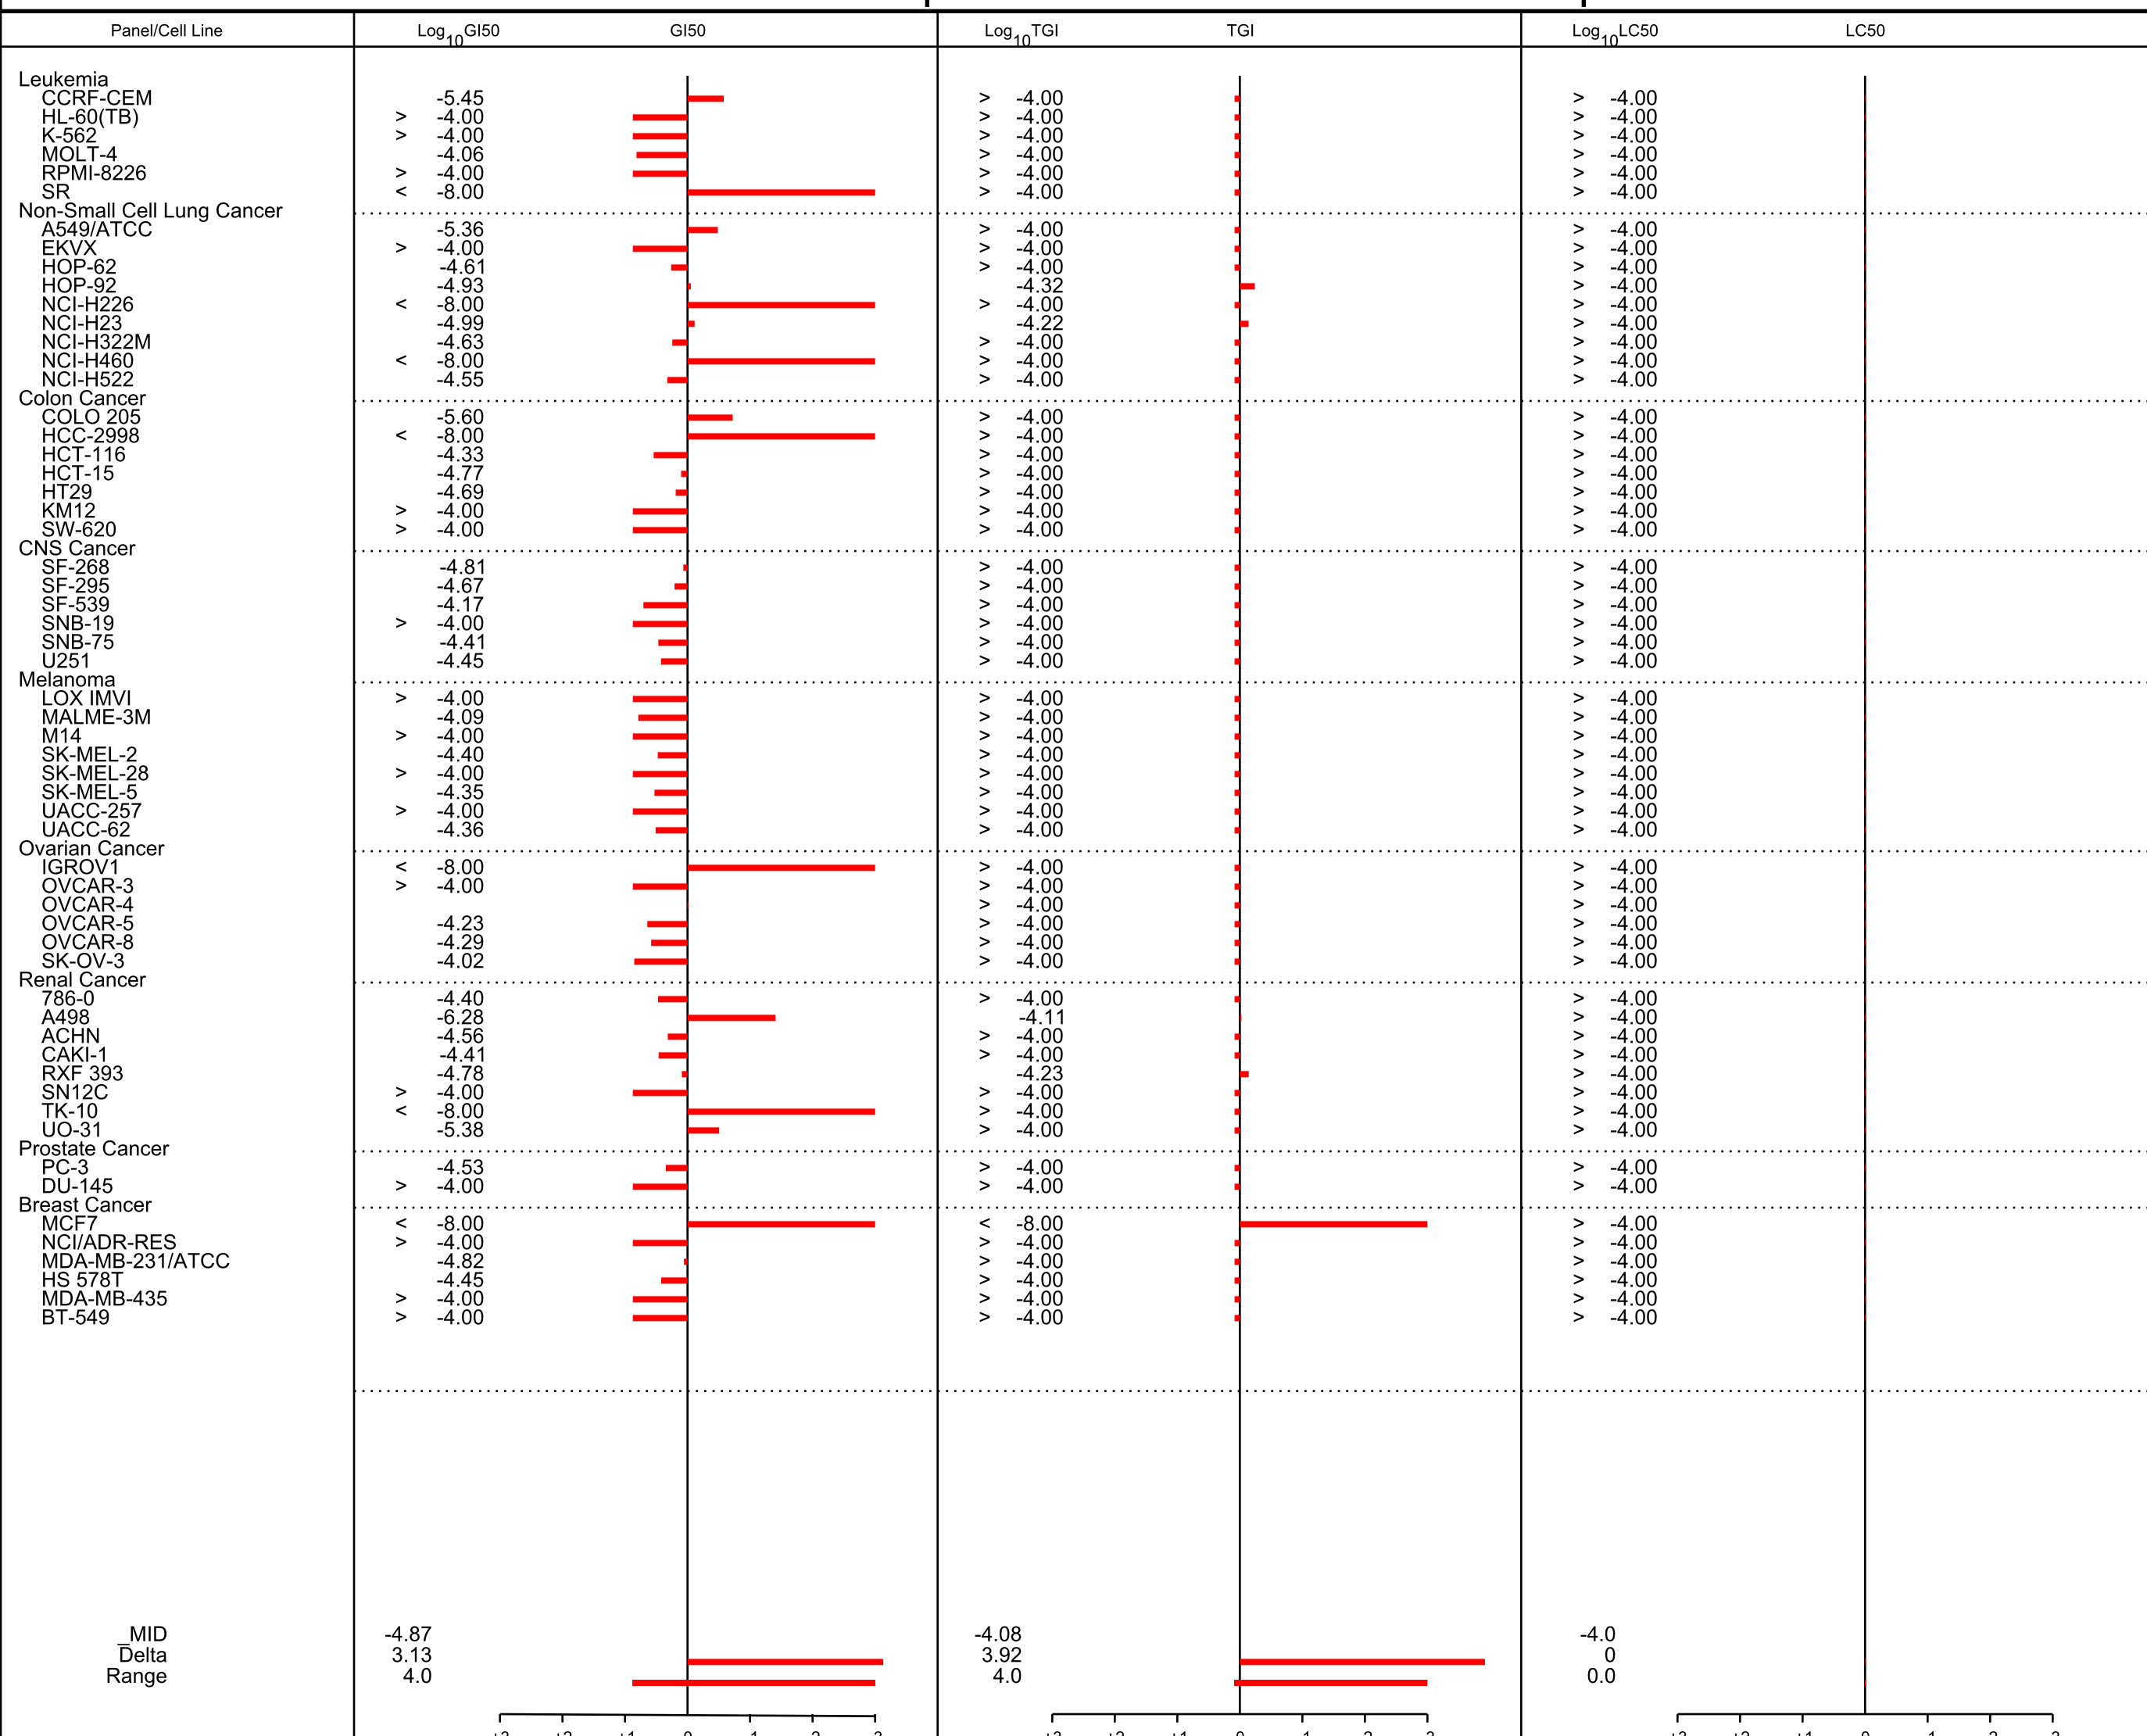

Supplement: JCMM-24-1750-s002.pdf [file JCMM-24-1750-s002.pdf]
